# Supplementary material for: [LnNa(PhCO2)4] (Ln = Ho, Dy): the first examples of chiral srs 3D networks constructed using the monotopic benzoate ligand
Source: Royal Society of Chemistry journal article supplement (doi:10.1039/b923998g), 2010-01-01
Supplement: b923998g.pdf [file b923998g.pdf]

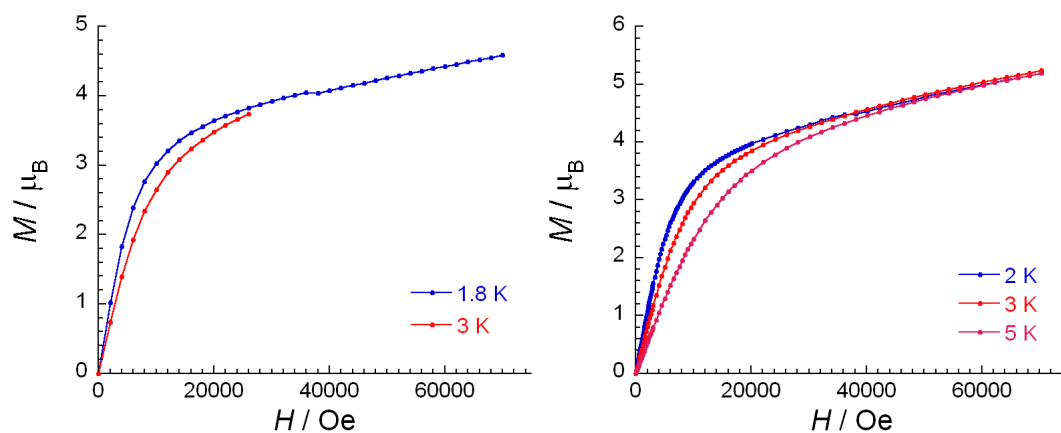

Figure S1 The plots of  $M$  vs  $H$  for compounds **1** (left) and **2** (right) at indicated temperatures.

For  $\text{NaHoC}_{28}\text{H}_{20}\text{O}_8$ : IR (KBr),  $\nu/\text{cm}^{-1} = 3062(\text{w}), 1626(\text{s}), 1618(\text{s}), 1602(\text{s}), 1554(\text{s}), 1497(\text{m}), 1424(\text{s}), 1307(\text{w}), 1178(\text{m}), 1071(\text{w}), 1023(\text{W}), 856(\text{m}), 718(\text{s}), 686(\text{m}), 675(\text{w}), 562(\text{w}), 430(\text{m})$ .

For  $\text{NaDyC}_{28}\text{H}_{20}\text{O}_8$ : IR (KBr),  $\nu/\text{cm}^{-1} = 3062(\text{w}), 1626(\text{s}), 1618(\text{s}), 1602(\text{s}), 1554(\text{s}), 1497(\text{m}), 1424(\text{s}), 1307(\text{w}), 1178(\text{m}), 1071(\text{w}), 1023(\text{W}), 856(\text{m}), 718(\text{s}), 686(\text{m}), 675(\text{w}), 562(\text{w}), 430(\text{m})$ .
